# Supplementary material
Source: publisher site journal article supplement (http://www.degruyter.com/publication/journal_key/SPP/downloadAsset/SPP_SPP_2024_CFP_Climate%20and%20Sustainability.pdf)
Supplement: Supplementary file 1 [file SPP_SPP_2024_CFP_Climate%20and%20Sustainability.pdf]

## CALL FOR PAPERS Statistics, Politics and Policy

**Vol. 2024 No. 2**

### **Special Issue: Climate Change and Sustainability**

“Listen to the science!” has been one of the most used and well-known slogans of the climate movement in the past years. Indeed, few topics on the global political agenda have been more intensely driven and shaped by the progress of scientific insight and ever more robust statistic models than climate policy and politics. While the climatological basis of activists’ arguments is ubiquitous, the political research into climate and sustainability offers countless new questions to study in an age of pressing public awareness and more frequent extreme weather events linked to climate change.

Within the climate dimension of this special issue, potential topics range from climate policies, their creation, implementation, and effectiveness, to party politics of climate change and politically relevant impacts of climate change. As much as political decisions and their implementation might influence the evolution of climate change, the development already impacts policy and politics. Two angles of study are thus possible: on the one hand, contributions in this dimension may investigate how political actors on any level deal with climate change. On the other hand, authors may focus on how climate change and related extreme weather events influence voting behavior, the relationship between society and politics, and eventually the entire political system.

The second dimension of the issue’s title focusses on the 17 UN sustainability goals and their relation to existing policy implementation. Contributions may therefore focus on policy formation and implementation or on the evaluation of policy measures and programs.

In this special issue, we thus invite statistics-based and policy-centered contributions to the field of climate and sustainability. We especially invite submissions on the following areas and topics:

- Climate policy implementation
- Policy evaluation and impact assessment
- Comparative perspectives on climate policy effectiveness
- Climate change and party politics
- Climate and mobilization
- Climate change and democracy
- Voter opinion and attitudes towards sustainability
- Comparative perspectives of environmental policy analysis on sustainability goals

We accept the submission of **research notes** (5,000 words max.) and **full articles** (9,000 words) for this special issue.

### **Rewarding outstanding work**

In 2023 and 2024 the Board of Editors will award the Emil J. Gumbel Prize to the author of an outstanding contribution published in Statistics, Politics and Policy.

The reward includes a financial incentive of 500 USD.

**Manuscripts should be submitted until 30th of May 2024.**

All documents are to be handed in via our official SPP ScholarOne online center:

<http://mc.manuscriptcentral.com/dgspp>

Pre-formatting to our publication style is not necessary. Final formatting is required only after acceptance. As a hybrid journal we offer classical and open-access publication options. For author guidelines and further information on Statistics, Politics and Policy visit the website:

<https://www.degruyter.com/journal/key/spp/html>

You may also contact the Managing Editors ([spp@politik.uni-freiburg.de](mailto:spp@politik.uni-freiburg.de)) with questions. Manuscripts will be subject to a double-blind peer-review process. Accepted papers will be published in Statistics, Politics and Policy ahead-of-print in mid 2024.

*Kind regards,*

*Prof. Dr. Uwe Wagschal, Editor-in-Chief ([uwe.wagschal@politik.uni-freiburg.de](mailto:uwe.wagschal@politik.uni-freiburg.de))*

*Judith Reinbold, Managing Editor*

*Ronald Schleeauf, Managing Editor*
